# Supplementary material for: Sulfur loaded in curved graphene and coated with conductive polyaniline: preparation and performance as a cathode for lithium–sulfur batteries
Source: Royal Society of Chemistry journal article supplement (doi:10.1039/c5ta02207j), 2015-01-01
Supplement: c5ta02207j1.pdf [file c5ta02207j1.pdf]

## Electronic Supplementary Information

### **Sulfur loaded in curved graphene and coated with conductive polyaniline: Preparation and performance as cathode of lithium-sulfur battery**

Xiaogang Li<sup>a, b</sup>, Mumin Rao<sup>c</sup>, Haibin Lin<sup>a</sup>, Dongrui Chen<sup>a</sup>, Yanlin Liu<sup>a</sup>, Shizhu Liu<sup>a</sup>,  
Youhao Liao<sup>a, c</sup>, Lidan Xing<sup>a, c</sup>, Mengqing Xu<sup>a, c</sup>, Weishan Li<sup>a, b, c, \*</sup>

<sup>a</sup> School of Chemistry and Environment, South China Normal University, Guangzhou 510006, China

<sup>b</sup> College of Materials Science and Engineering, South China University of Technology, Guangzhou 510641, China

<sup>c</sup> Engineering Research Center of MTEES (Ministry of Education), Research Center of BMET (Guangdong Province), Engineering Lab. of OFMHEB (Guangdong Province), Key Lab. of ETESPG (GHEI), and Innovative Platform for ITBMD (Guangzhou Municipality), South China Normal University, Guangzhou 510006, China

---

\* Corresponding author: School of Chemistry and Environment, South China Normal University.  
E-mail address: [liwsh@scnu.edu.cn](mailto:liwsh@scnu.edu.cn) (W. S. Li).

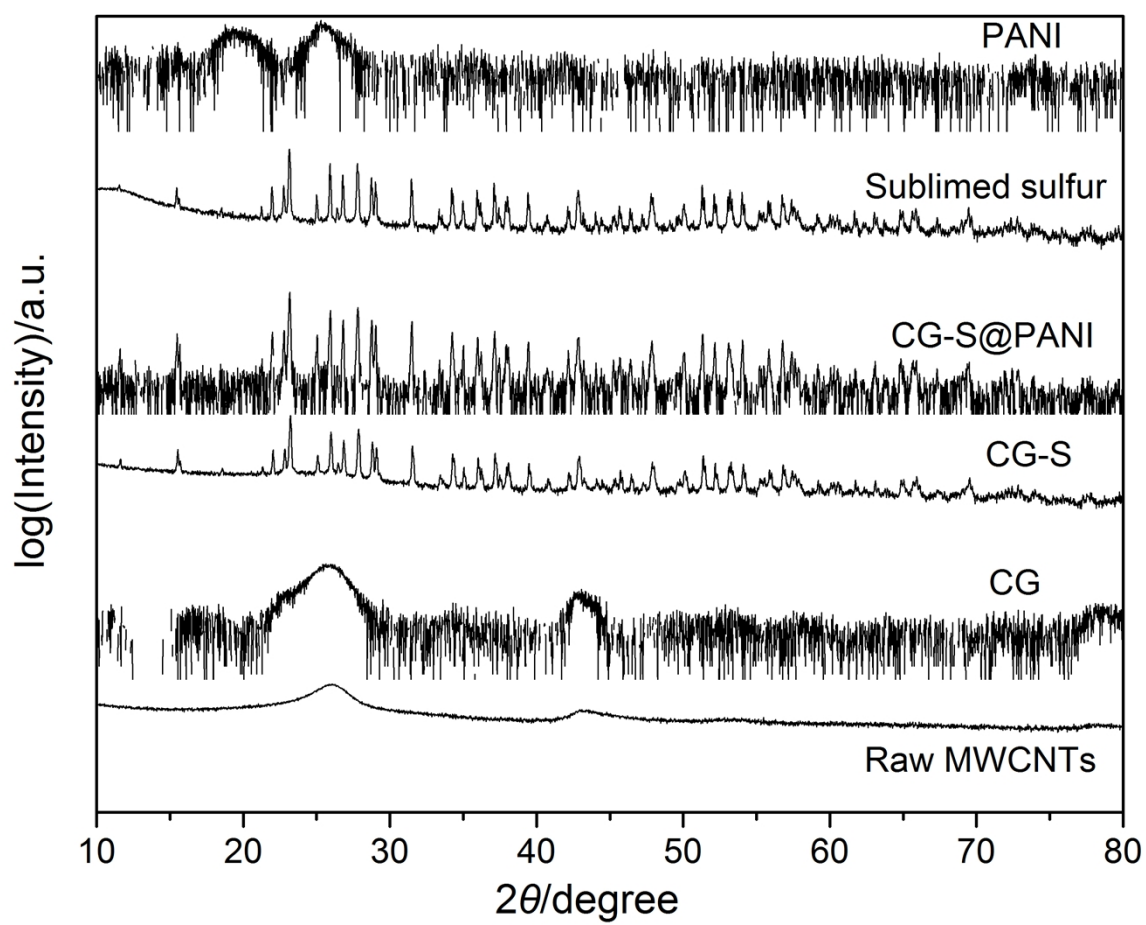

**Fig. S1** XRD patterns ( $\log(\text{Intensity})-2\theta$ ) of raw MWCNTs, CG, CG-S, CG-S@PANI, PANI, and sublimed sulfur.

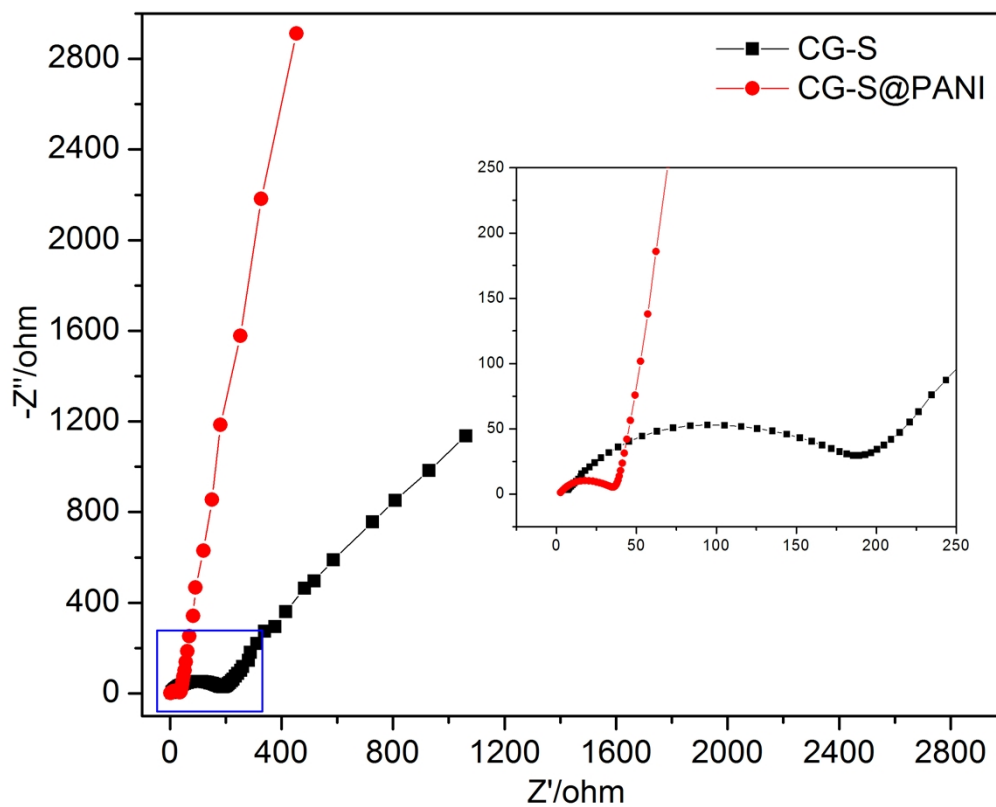

**Fig. S2** Electrochemical impedance spectra of CG-S and CG-S@PANI at fully charged state after 100 cycles at 0.2 C.
